# Supplementary material
Source: HighWire-hosted journal article supplement (https://bmjopensem.bmj.com/content/4/1/e000321)
Supplement: inline-supplementary-material-1 [file inline-supplementary-material-1.docx]

**Supplementary Table 1. Classification codes for included activities**

| **Classification code** | **Sport and recreational activity** |
| --- | --- |
| U63 | Equestrian activities |
| U63.0 | Equestrian events |
| U63.01 | Dressage |
| U63.02 | Show jumping |
| U63.03 | Steeplechase and cross-country eventing |
| U63.08 | Other specified equestrian event |
| U63.09 | Equestrian event, unspecified |
| U63.1 | Endurance riding |
| U63.2 | Polo and polocrosse |
| U63.3 | Horse racing events |
| U63.31 | Horse racing |
| U63.32 | Hurdle racing |
| U63.4 | Rodeo |
| U63.5 | Trail or general horseback riding |
| U63.6 | Trotting and harness |
| U63.8 | Other specified equestrian activity |
| U63.9 | Unspecified equestrian activity |
